# Supplementary material
Source: Springer Nature journal article supplement (https://www.springermedizin.de/resource/supplementary/12885_2009_1690_MOESM3_ESM.pdf/9472674)

**A**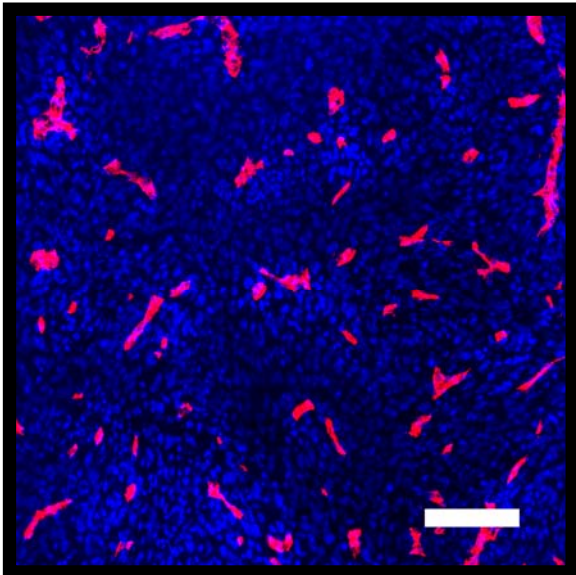**B**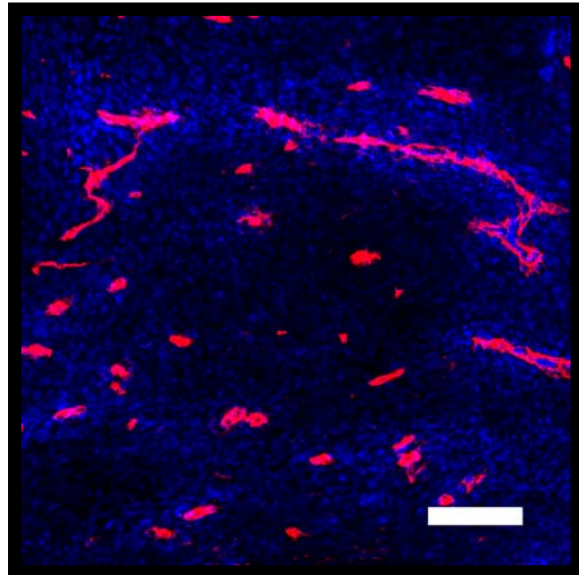**Mouse****C**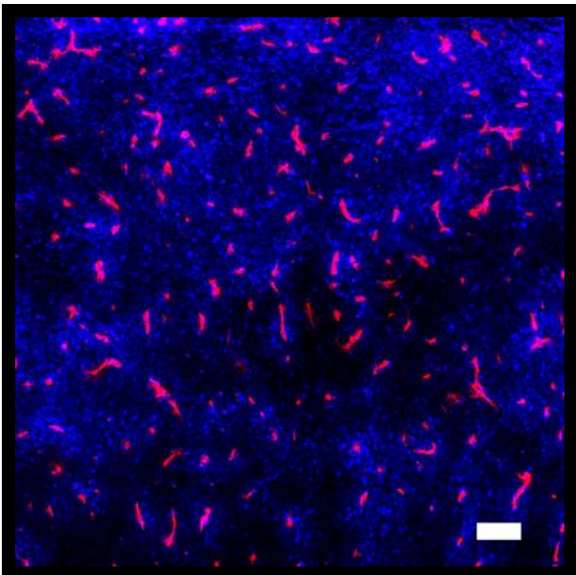**D**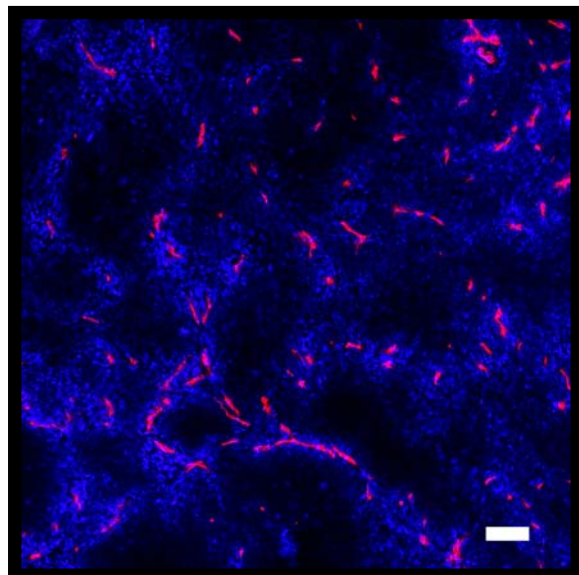**Human**

Supplement: MOESM3 [file 9472674]
